# Supplementary material for: A systematic review and meta-analysis of Penner serotype prevalence of Campylobacter jejuni in low- and middle-income countries
Source: PubMed Central journal article supplement (PMC8099051; doi:10.1371/journal.pone.0251039), 2021-05-05

S3 Fig. Forest plot for capsule type HS3c.

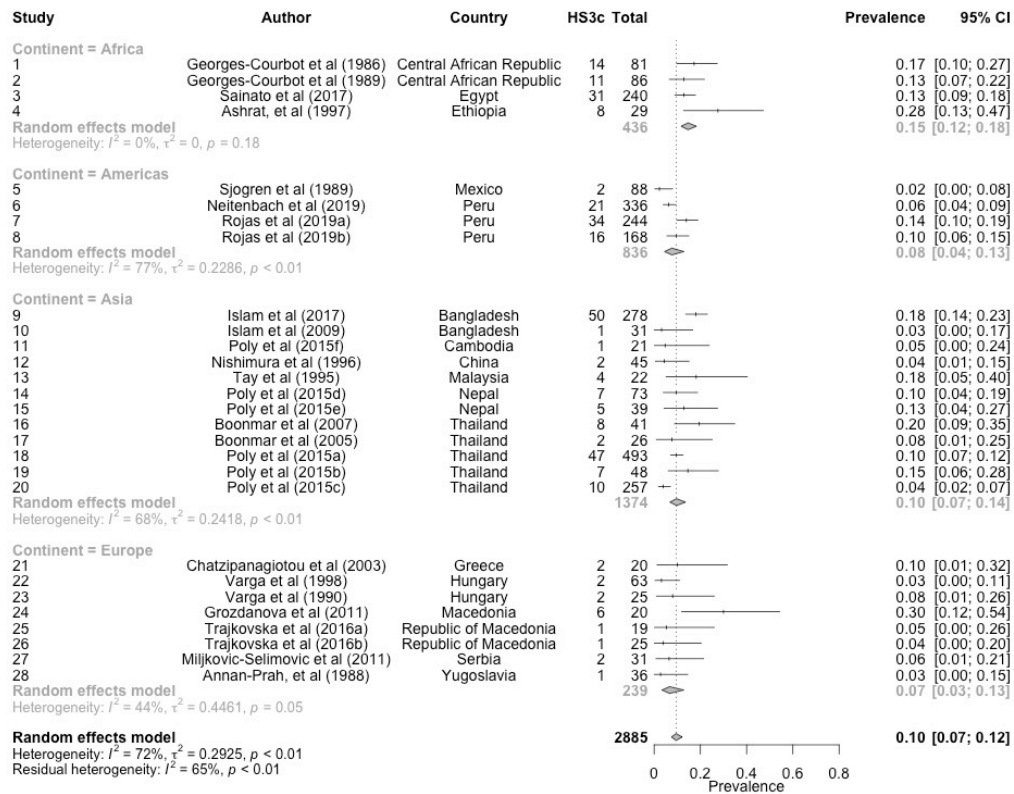

Supplement: pone.0251039.s003.pdf [file pone.0251039.s003.pdf]
