# Supplementary material for: A systematic review and meta-analysis of Penner serotype prevalence of Campylobacter jejuni in low- and middle-income countries
Source: PubMed Central journal article supplement (PMC8099051; doi:10.1371/journal.pone.0251039), 2021-05-05
Supplement: pone.0251039.s017.pdf [file pone.0251039.s017.pdf]

**S1 Table. Number of isolates (percent of total) and number of observations identified by region and income classification.**

|        |          | Income Classification |             |             |               |               |
|--------|----------|-----------------------|-------------|-------------|---------------|---------------|
|        |          | Low                   | Middle      | High        | Total         |               |
| Region | Africa   | Isolates (%)          | 499 (1.11)  | 574 (1.28)  | 0 (0)         | 1073 (2.40)   |
|        |          | Observations          | 8           | 4           | 0             | 12            |
|        | Americas | Isolates (%)          | 0 (0)       | 986 (2.20)  | 1510 (3.37)   | 2496 (5.57)   |
|        |          | Observations          | 0           | 5           | 14            | 19            |
|        | Asia     | Isolates (%)          | 873 (1.95)  | 975 (2.18)  | 2318 (5.17)   | 4166 (9.30)   |
|        |          | Observations          | 9           | 6           | 13            | 28            |
|        | Europe   | Isolates (%)          | 0 (0)       | 527 (1.17)  | 35470 (79.18) | 35997 (80.35) |
|        |          | Observations          | 0           | 11          | 57            | 68            |
|        | Oceania  | Isolates (%)          | 0 (0)       | 0 (0)       | 1067 (2.38)   | 1067 (2.38)   |
|        |          | Observations          | 0           | 0           | 11            | 11            |
|        | Total    | Isolates (%)          | 1372 (3.06) | 3062 (6.83) | 40365 (90.10) | 44799         |
|        |          | Observations          | 17          | 26          | 95            | 138           |
