# Supplementary material for: A systematic review and meta-analysis of Penner serotype prevalence of Campylobacter jejuni in low- and middle-income countries
Source: PubMed Central journal article supplement (PMC8099051; doi:10.1371/journal.pone.0251039), 2021-05-05
Supplement: pone.0251039.s018.pdf [file pone.0251039.s018.pdf]

S2 Table. Pooled estimates for coverage of hypothetical regional and global vaccine formulations.

|                     |                          | HS1/44 | HS2    | HS3c     | HS4c | HS5/31 | HS6/7  | HS8/17 | HS9      | HS10 | HS15   | HS19   | HS23/36 | HS37     | HS41 | HS53   | Including Non-Typable Strains |                   |                   |                   |                   | Excluding Non-Typable Strains |                   |                   |                   |                   |
|---------------------|--------------------------|--------|--------|----------|------|--------|--------|--------|----------|------|--------|--------|---------|----------|------|--------|-------------------------------|-------------------|-------------------|-------------------|-------------------|-------------------------------|-------------------|-------------------|-------------------|-------------------|
|                     |                          | Global | Africa | Americas | Asia | Europe | Global | Africa | Americas | Asia | Europe | Global | Africa  | Americas | Asia | Europe |                               |                   |                   |                   |                   |                               |                   |                   |                   |                   |
| <b>Monovalent</b>   | <b>Global</b>            |        |        |          |      |        |        |        |          |      |        |        |         |          |      |        | 10.6 (8.4, 13.2)              | 9.3 (6.2, 13.7)   | 13.4 (11.1, 16.0) | 8.9 (5.9, 13.4)   | 13.4 (7.5, 22.8)  | 12.6 (10.2, 15.6)             | 11.3 (7.3, 17.2)  | 14.5 (12.1, 17.3) | 11.0 (7.7, 15.4)  | 16.5 (9.5, 27.1)  |
| <b>Bivalent</b>     | <b>Global, Af, As, E</b> |        |        |          |      |        |        |        |          |      |        |        |         |          |      |        | 19.1 (15.4, 23.4)             | 16.8 (11.5, 23.8) | 19.5 (16.9, 22.4) | 16.3 (10.6, 24.1) | 28.8 (21.2, 37.8) | 23.6 (19.4, 28.4)             | 20.6 (13.4, 30.2) | 21.1 (18.4, 23.9) | 20.9 (14.7, 28.7) | 36.4 (28.4, 45.2) |
|                     | <b>Americas</b>          |        |        |          |      |        |        |        |          |      |        |        |         |          |      |        | 16.1 (13.3, 19.4)             | 18.6 (16.0, 21.4) | 21.5 (18.9, 24.3) | 13.6 (9.0, 20.1)  | 16.0 (9.8, 25.1)  | 20.4 (17.6, 23.6)             | 22.4 (19.4, 25.7) | 23.2 (20.5, 26.2) | 18.1 (13.3, 24.3) | 19.8 (12.9, 29.3) |
| <b>Quadrivalent</b> | <b>Global, Af, As</b>    |        |        |          |      |        |        |        |          |      |        |        |         |          |      |        | 32.8 (28.1, 37.8)             | 31.8 (25.1, 39.2) | 35.0 (30.9, 39.4) | 30.2 (20.7, 41.6) | 37.0 (30.0, 44.5) | 40.9 (35.8, 46.2)             | 40.8 (32.4, 49.9) | 38.3 (34.7, 42.1) | 38.7 (28.5, 49.9) | 45.8 (37.6, 54.2) |
|                     | <b>Europe</b>            |        |        |          |      |        |        |        |          |      |        |        |         |          |      |        | 30.9 (25.9, 36.4)             | 31 (26.8, 35.5)   | 29.6 (23.7, 36.3) | 24.9 (16.3, 35.9) | 41.8 (32.0, 52.4) | 38.3 (32.5, 44.3)             | 38.4 (31.5, 45.9) | 32.3 (25.6, 39.8) | 31.7 (22.5, 42.6) | 51.8 (40.0, 63.5) |
|                     | <b>Americas</b>          |        |        |          |      |        |        |        |          |      |        |        |         |          |      |        | 26.8 (23.2, 30.8)             | 26.1 (20.8, 32.2) | 36.9 (33.3, 40.7) | 25.6 (19.1, 33.5) | 24.6 (17.9, 32.7) | 34.0 (30.6, 37.6)             | 33.3 (27.1, 40.0) | 40.1 (36.8, 43.4) | 33.9 (28.0, 40.4) | 30.2 (23.2, 38.2) |
| <b>Hexavalent</b>   | <b>Global</b>            |        |        |          |      |        |        |        |          |      |        |        |         |          |      |        | 45.4 (39.0, 51.9)             | 47.0 (40.1, 54.0) | 45.0 (38.9, 51.2) | 39.4 (26.4, 54.2) | 52.5 (41.9, 62.8) | 56.6 (49.3, 63.6)             | 58.8 (47.7, 69.0) | 48.9 (42.8, 55.0) | 50.5 (36.5, 64.5) | 65.7 (52.3, 77.0) |
|                     | <b>Africa</b>            |        |        |          |      |        |        |        |          |      |        |        |         |          |      |        | 43.8 (38.7, 49.0)             | 46.1 (38.8, 53.6) | 41.9 (37.3, 46.5) | 40.3 (30.3, 51.1) | 47.8 (37.4, 58.3) | 53.5 (48.6, 58.4)             | 56.6 (51.1, 62.0) | 45.5 (41.4, 49.7) | 51.2 (42.1, 60.3) | 58.9 (47.3, 69.5) |
|                     | <b>Asia</b>              |        |        |          |      |        |        |        |          |      |        |        |         |          |      |        | 43.0 (37.9, 48.2)             | 41.3 (32.6, 50.5) | 44.8 (41.1, 48.5) | 43.2 (32.6, 54.6) | 42.5 (37.7, 47.4) | 53.5 (48.6, 58.2)             | 53.5 (44.2, 62.5) | 48.4 (45.1, 51.8) | 54.7 (45.3, 63.7) | 53.8 (44.6, 62.8) |
|                     | <b>Europe</b>            |        |        |          |      |        |        |        |          |      |        |        |         |          |      |        | 42.4 (35.6, 49.5)             | 40.9 (35.6, 46.4) | 38.7 (35.3, 42.2) | 37.0 (22.0, 55.0) | 55.8 (45.4, 65.7) | 53.5 (45.3, 61.6)             | 49.5 (40.2, 58.8) | 42.0 (38.7, 45.4) | 46.6 (30.6, 63.4) | 69.1 (56.9, 79.1) |
|                     | <b>Americas</b>          |        |        |          |      |        |        |        |          |      |        |        |         |          |      |        | 42.3 (37.1, 47.6)             | 38.1 (30.3, 46.5) | 49.0 (44.6, 53.3) | 41.3 (30.7, 52.7) | 45.5 (37.8, 53.5) | 52.7 (47.5, 57.8)             | 49.3 (39.3, 59.3) | 53.3 (49.6, 56.9) | 52.2 (42.6, 61.7) | 57.1 (46.3, 67.3) |
| <b>Octavalent</b>   | <b>Global, Af, As</b>    |        |        |          |      |        |        |        |          |      |        |        |         |          |      |        | 53.8 (47.7, 59.7)             | 53.5 (43.0, 63.6) | 52.4 (48.3, 56.4) | 54.1 (41.8, 66.0) | 54.0 (43.9, 63.7) | 66.9 (61.1, 72.2)             | 69.0 (59.3, 77.3) | 56.8 (53.4, 60.1) | 67.9 (56.9, 77.1) | 67.6 (54.6, 78.4) |
|                     | <b>Europe</b>            |        |        |          |      |        |        |        |          |      |        |        |         |          |      |        | 50.9 (43.1, 58.5)             | 46.8 (39.1, 54.7) | 46.9 (40.2, 53.8) | 47.6 (29.3, 66.6) | 63.4 (51.4, 73.9) | 65.2 (56.4, 73.0)             | 60.3 (50.7, 69.2) | 52.8 (43.5, 61.9) | 59.9 (41.3, 76.1) | 79.9 (64.7, 89.6) |
|                     | <b>Americas</b>          |        |        |          |      |        |        |        |          |      |        |        |         |          |      |        | 46.4 (40.8, 52.1)             | 41.4 (32.6, 50.9) | 58.0 (51.1, 64.5) | 45.4 (34.0, 57.3) | 48.0 (41.5, 54.5) | 57.7 (52.5, 62.7)             | 53.9 (43.2, 64.3) | 63.3 (57.7, 68.6) | 57.1 (47.3, 66.4) | 59.9 (51.3, 68.0) |
| <b>Decavalent</b>   | <b>Global</b>            |        |        |          |      |        |        |        |          |      |        |        |         |          |      |        | 60.1 (53.4, 66.4)             | 56.8 (46.3, 66.8) | 64.9 (60.0, 69.5) | 62.0 (48.1, 74.1) | 59.0 (47.0, 70.1) | 74.2 (68.6, 79.2)             | 73.2 (64.4, 80.6) | 70.6 (66.9, 74.1) | 76.7 (65.8, 84.9) | 74.1 (59.5, 84.9) |
|                     | <b>Africa</b>            |        |        |          |      |        |        |        |          |      |        |        |         |          |      |        | 59.6 (52.6, 66.2)             | 59.4 (48.5, 69.4) | 59.4 (54.6, 64.0) | 60.8 (45.5, 74.2) | 58.4 (47.3, 68.6) | 73.9 (67.7, 79.3)             | 76.9 (66.9, 84.6) | 64.4 (60.3, 68.3) | 75.2 (62.4, 84.8) | 72.7 (59.9, 82.7) |
|                     | <b>Asia</b>              |        |        |          |      |        |        |        |          |      |        |        |         |          |      |        | 60.1 (53.4, 66.4)             | 56.8 (46.3, 66.8) | 64.9 (60.0, 69.5) | 62.0 (48.1, 74.1) | 59.0 (47.0, 70.1) | 74.2 (68.6, 79.2)             | 73.2 (64.4, 80.6) | 70.6 (66.9, 74.1) | 76.7 (65.8, 84.9) | 74.1 (59.5, 84.9) |
|                     | <b>Europe</b>            |        |        |          |      |        |        |        |          |      |        |        |         |          |      |        | 56.3 (48.3, 64.0)             | 49.7 (41.3, 58.2) | 55.3 (47.5, 62.8) | 54.1 (34.4, 72.6) | 69.1 (57.8, 78.6) | 71.9 (63.4, 79.1)             | 64.2 (54.1, 73.2) | 61.8 (52.9, 70.0) | 67.8 (48.6, 82.5) | 86.0 (73.8, 93.0) |
|                     | <b>Americas</b>          |        |        |          |      |        |        |        |          |      |        |        |         |          |      |        | 53.8 (48.3, 59.2)             | 46.9 (37.4, 56.6) | 65.7 (57.9, 72.8) | 54.9 (44.1, 65.3) | 52.0 (46.6, 57.3) | 66.5 (61.9, 70.9)             | 61.1 (50.3, 71.0) | 71.7 (65.4, 77.3) | 68.3 (60.4, 75.2) | 65.9 (58.7, 72.4) |

Based on pooled prevalence estimates, different formulations for broadest possible coverage were assessed for each region (Af = Africa, As = Asia, E = Europe), as well as cumulatively (global). Shaded squares indicate inclusion of a capsule type in each respective formulation.
