# Supplementary material for: A systematic review and meta-analysis of Penner serotype prevalence of Campylobacter jejuni in low- and middle-income countries
Source: PubMed Central journal article supplement (PMC8099051; doi:10.1371/journal.pone.0251039), 2021-05-05
Supplement: pone.0251039.s019.pdf [file pone.0251039.s019.pdf]

## **S1 Text. Search terms.**

**Database searches conducted on 19 July 2019.**

### **PubMed:**

("Campylobacter"[Mesh] OR "Campylobacter Infections"[Mesh] OR campylobacter\*[tiab] OR jejuni[tiab] OR ((traveler\*[tiab] OR traveller\*[tiab]) AND (diarrhea\*[tiab] OR diarrhoea\*[tiab] OR diarhea\*[tiab] OR diarhoea\*[tiab] OR diahrrea\*[tiab]))) AND ("Bacterial Capsules"[Mesh] OR "Capsules"[Mesh] OR "Serotyping"[Mesh] OR "Serogroup"[Mesh] OR serogroup\*[tiab] OR "Polysaccharides, Bacterial"[Mesh] OR "Multiplex Polymerase Chain Reaction"[Mesh] OR Penner[all fields] OR serotyp\*[tiab] OR serovar\*[tiab] OR capsul\*[tiab] OR encapsul\*[tiab] OR heat stable[tiab] OR HS[tiab] OR HS1\*[tiab] OR HS2\*[tiab] OR HS3\*[tiab] OR HS4\*[tiab] OR HS5\*[tiab] OR HS6\*[tiab] OR HS7\*[tiab] OR HS8\*[tiab] OR HS9\*[tiab] OR multiplex[tiab] OR polysaccharide\*[tiab]) AND "English"[language]

### **Scopus:**

TITLE-ABS-KEY(campylobacter\* OR jejuni OR ((traveler\* OR traveller\*) AND (diarrhea\* OR diarrhoea\* OR diarhea\* OR diarhoea\* OR diahrrea\*))) AND (TITLE-ABS-KEY(serogroup\* OR serotyp\* OR serovar\* OR capsul\* OR encapsul\* OR "heat stable" OR HS\* OR multiplex OR polysaccharide\*) OR ALL(Penner)) AND ( LIMIT-TO ( LANGUAGE,"English" ) )

### **Web of Science Core Collection:**

TS=(campylobacter\* OR jejuni OR ((traveler\* OR traveller\*) AND (diarrhea\* OR diarrhoea\* OR diarhea\* OR diarhoea\* OR diahrrea\*))) AND (TS=(serogroup\* OR serotyp\* OR serovar\* OR capsul\* OR encapsul\* OR "heat stable" OR HS OR HS1\* OR HS2\* OR HS3\* OR HS4\* OR HS5\* OR HS6\* OR HS7\* OR HS8\* OR HS9\* OR multiplex OR polysaccharide\*) OR TS=(Penner))

Restrict to English
